# Supplementary material for: Rapid High Performance Liquid Chromatography Determination and Optimization of Extraction Parameters of the α-Asarone Isolated from Perilla frutescens L
Source: MDPI journal article supplement (doi:10.3390/molecules22020270), 2017-02-10
Supplement: s1 [file s1]

# Supplementary Materials: Rapid High Performance Liquid Chromatography Determination and Optimization of Extraction Parameters of the $\alpha$ -Asarone Isolated from *Perilla frutescens* L.

Seung Hwan Hwang, Shin Hwa Kwon, Young-Hee Kang, Jae-Yong Lee and Soon Sung Lim

**Table S1.** Experimental range and values of the independent variables in the central composite design for optimization of extraction conditions.

| Variables                              | Symbol Coded   | Range and Levels |      |       |       |       |
|----------------------------------------|----------------|------------------|------|-------|-------|-------|
|                                        |                | −2               | −1   | 0     | +1    | +2    |
| Ratio of liquid to raw material (mL:g) | X <sub>1</sub> | 10:3             | 10:5 | 10:10 | 10:13 | 10:15 |
| Extraction Time (h)                    | X <sub>2</sub> | 1                | 1.5  | 2     | 2.5   | 3     |
| Ethanol concentration (%)              | X <sub>3</sub> | 50               | 70   | 80    | 90    | 100   |
